# Supplementary material for: Construction of acylhydrazidate-extended metal–organic frameworks
Source: Royal Society of Chemistry journal article supplement (doi:10.1039/c4dt00780h), 2014-05-09
Supplement: c4dt00780h1.pdf [file c4dt00780h1.pdf]

## Supporting materials

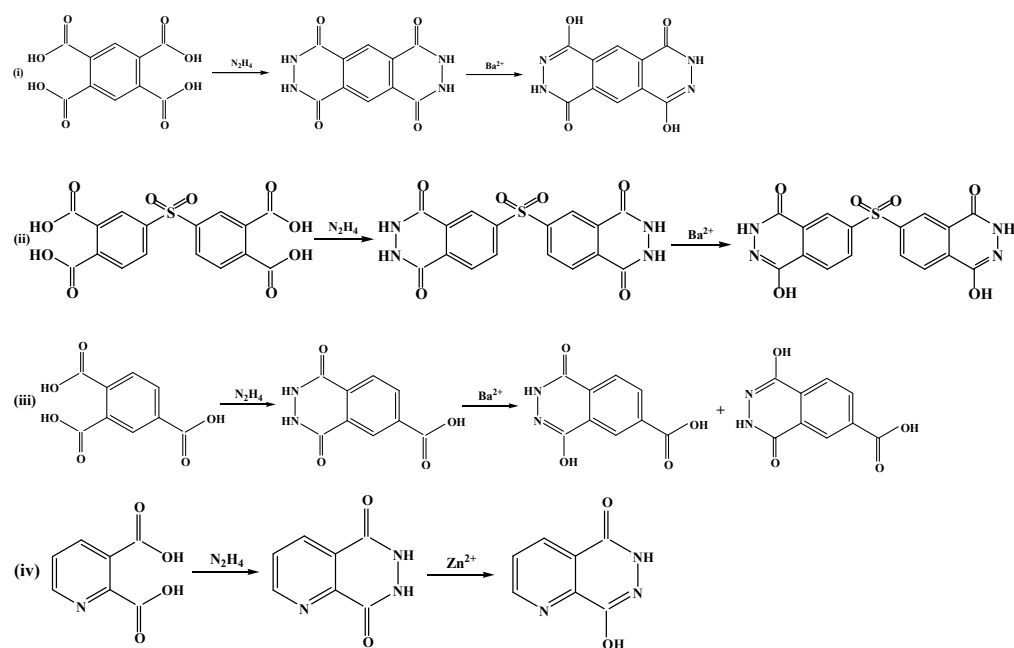

Scheme S1 Acylation and isomerization observed in 1-4.

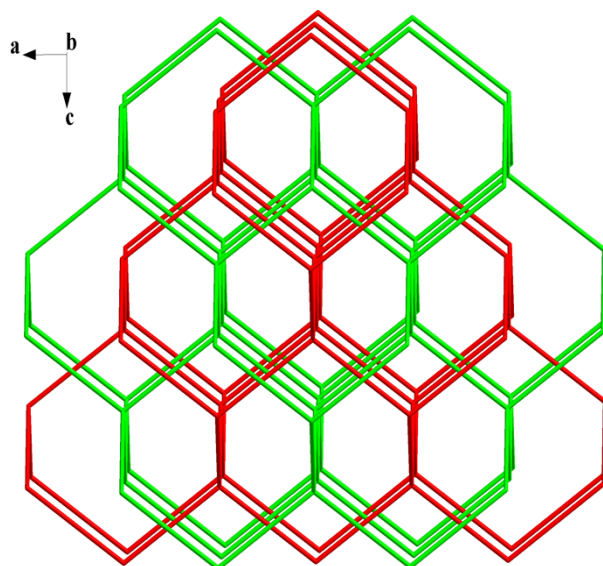

Fig. S1 Topological plot of 4, showing a 2-fold interpenetration.

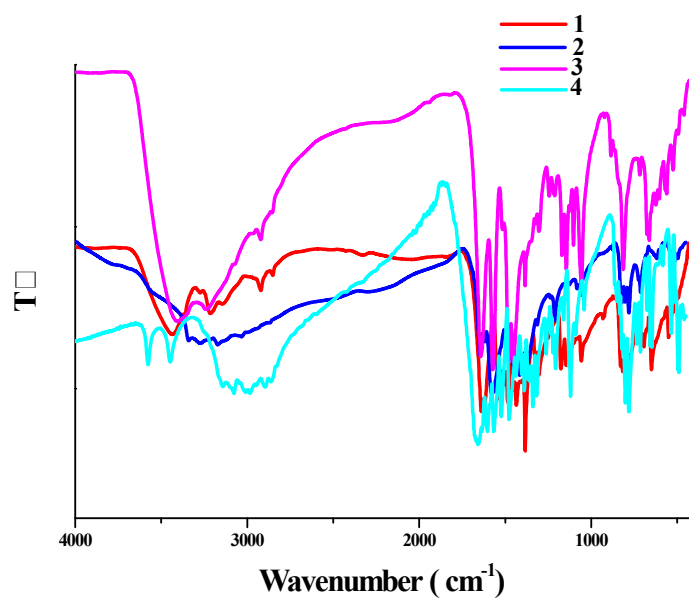

Fig. S2 IR spectra of 1-4.

Table S1 C-O distances of acylhydrazide ring moiety in 1-4.

|         | 1        |          | 2          | 3        |           | 4        |          |
|---------|----------|----------|------------|----------|-----------|----------|----------|
|         | pmdh I   | pmdh II  | sdpth      | cpth I   | cpth II   | pdh I    | pdh II   |
| C-O (Å) | 1.295(3) | 1.278(3) | 1.2807(10) | 1.284(9) | 1.293(10) | 1.271(5) | 1.326(5) |
| C=O (Å) | 1.254(3) | 1.245(3) | 1.2592(10) | 1.249(9) | 1.260(12) | 1.237(6) | 1.245(6) |

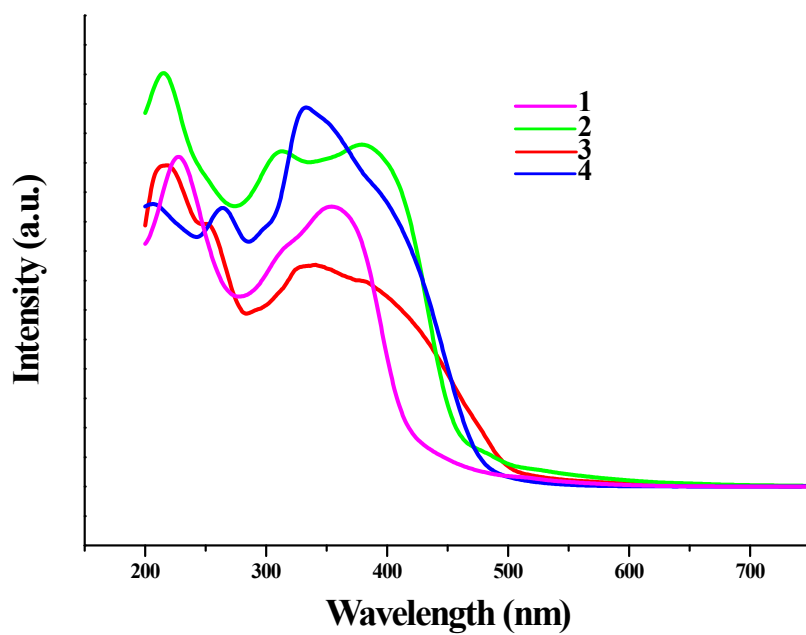

Fig. S3 UV-vis spectra of 1-4.

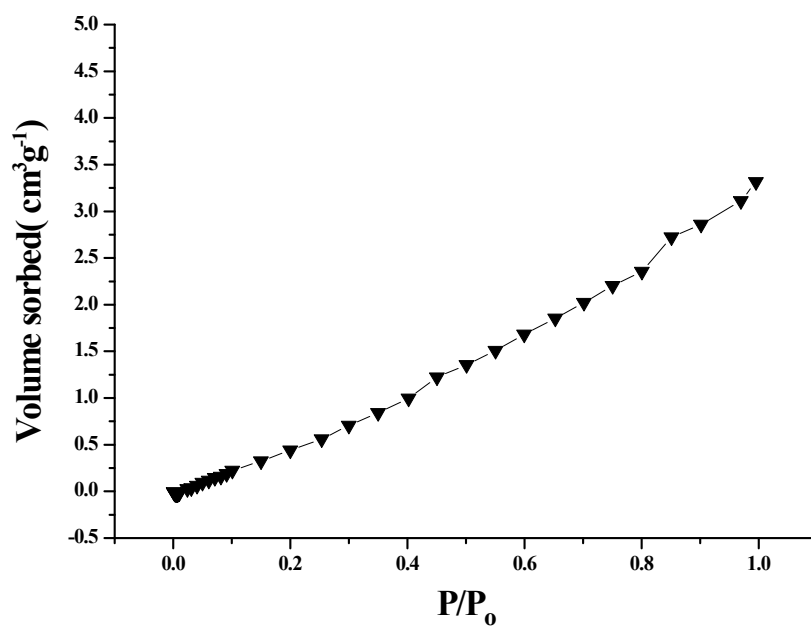

**Fig. S4** CO<sub>2</sub> adsorption isotherm of 2 at 273 K.
